# Supplementary material
Source: PubMed Central journal article supplement (PMC3477233)
Supplement: supp_mol.112.080531_SuppFigure2revised.pdf [file supp_mol.112.080531_SuppFigure2revised.pdf]

**Supplementary data Figure 2: Allosteric modulation of glutamate concentration-response curves for Ca<sup>2+</sup> mobilization in the high-expressing HEK293-rat mGlu5 cell line.**

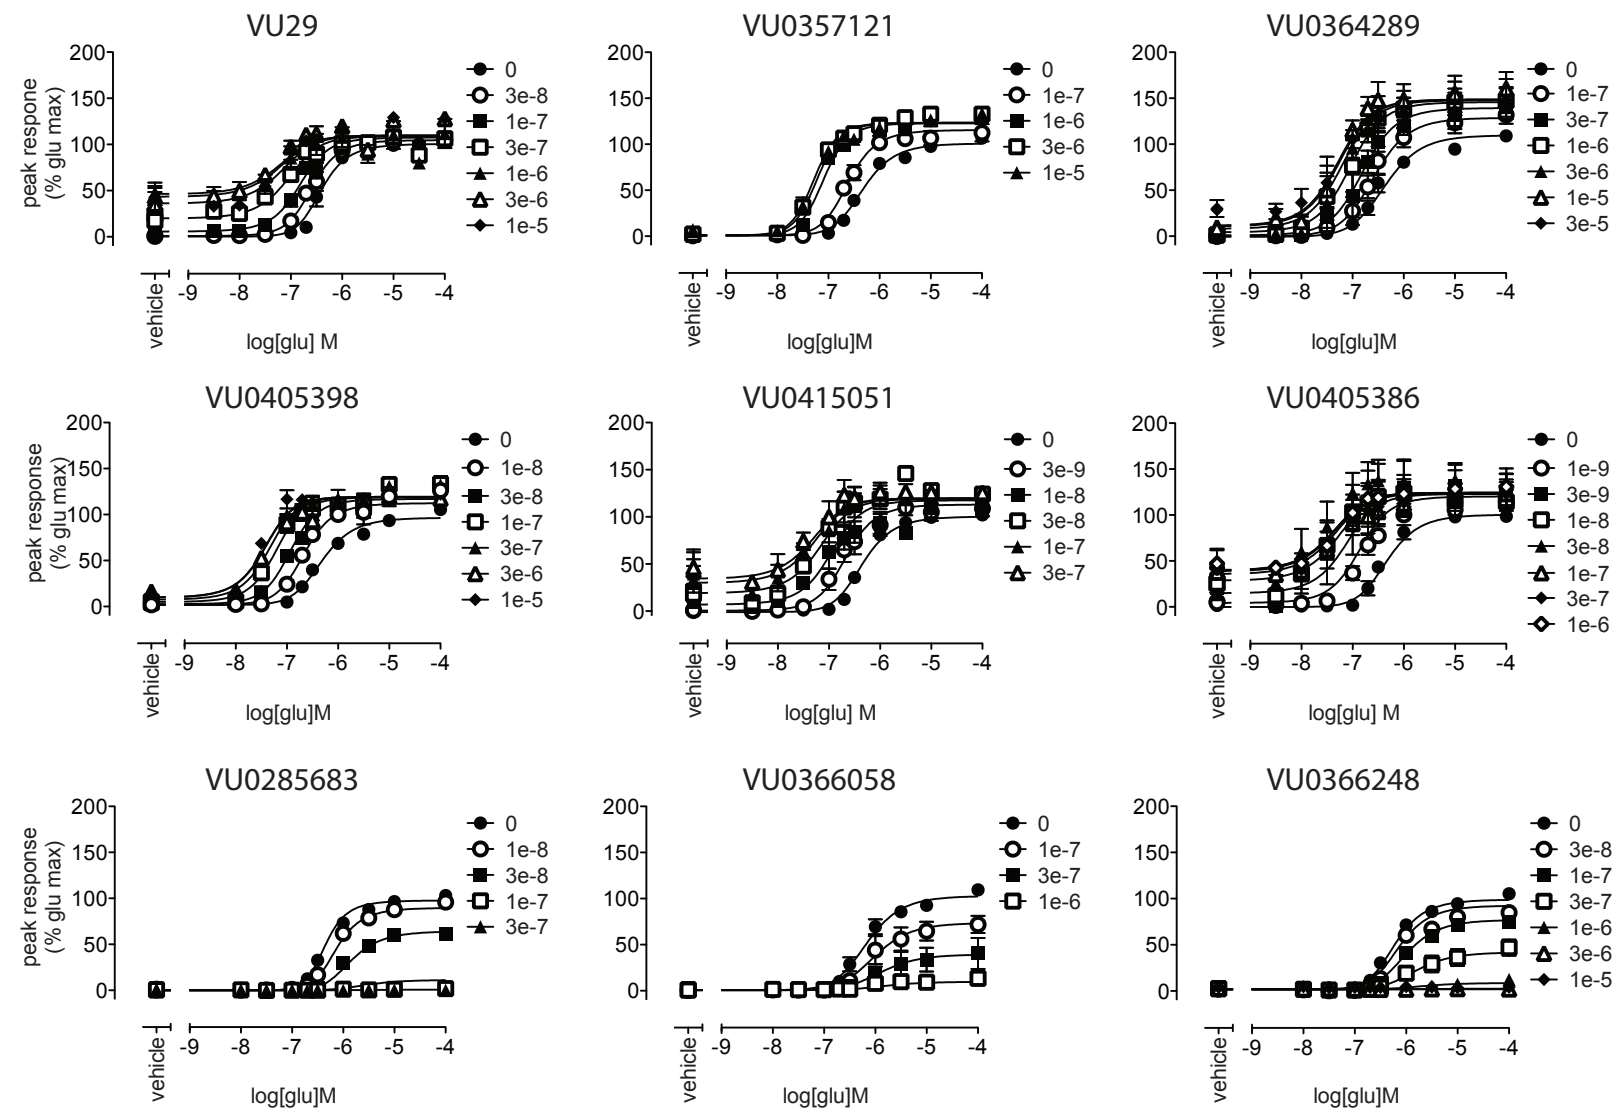

In the high-expressing HEK293-mGlu5-wt cell line, PAMs: VU29, VU0357121, VU0364289, VU0405398, VU0415051 and VU0405386, induce a leftward shift in the glutamate concentration-response curve for intracellular Ca<sup>2+</sup> mobilization and increase the maximal agonist response. NAMs: VU0285683, VU0366058 and VU0366248, inhibit glutamate-stimulated intracellular Ca<sup>2+</sup> mobilization. Data represent the mean  $\pm$  s.e.m. from a minimum of three independent determinations. Error bars not shown lie within the dimensions of the symbol.
