# Supplementary material
Source: PubMed Central journal article supplement (PMC3477233)
Supplement: supp_mol.112.080531_SuppFigure3revised.pdf [file supp_mol.112.080531_SuppFigure3revised.pdf]

**Supplementary data Figure 3: Allosteric modulation of glutamate concentration-response curves for ERK1/2 phosphorylation in the low-expressing HEK293A-rat mGlu5 cell line.**

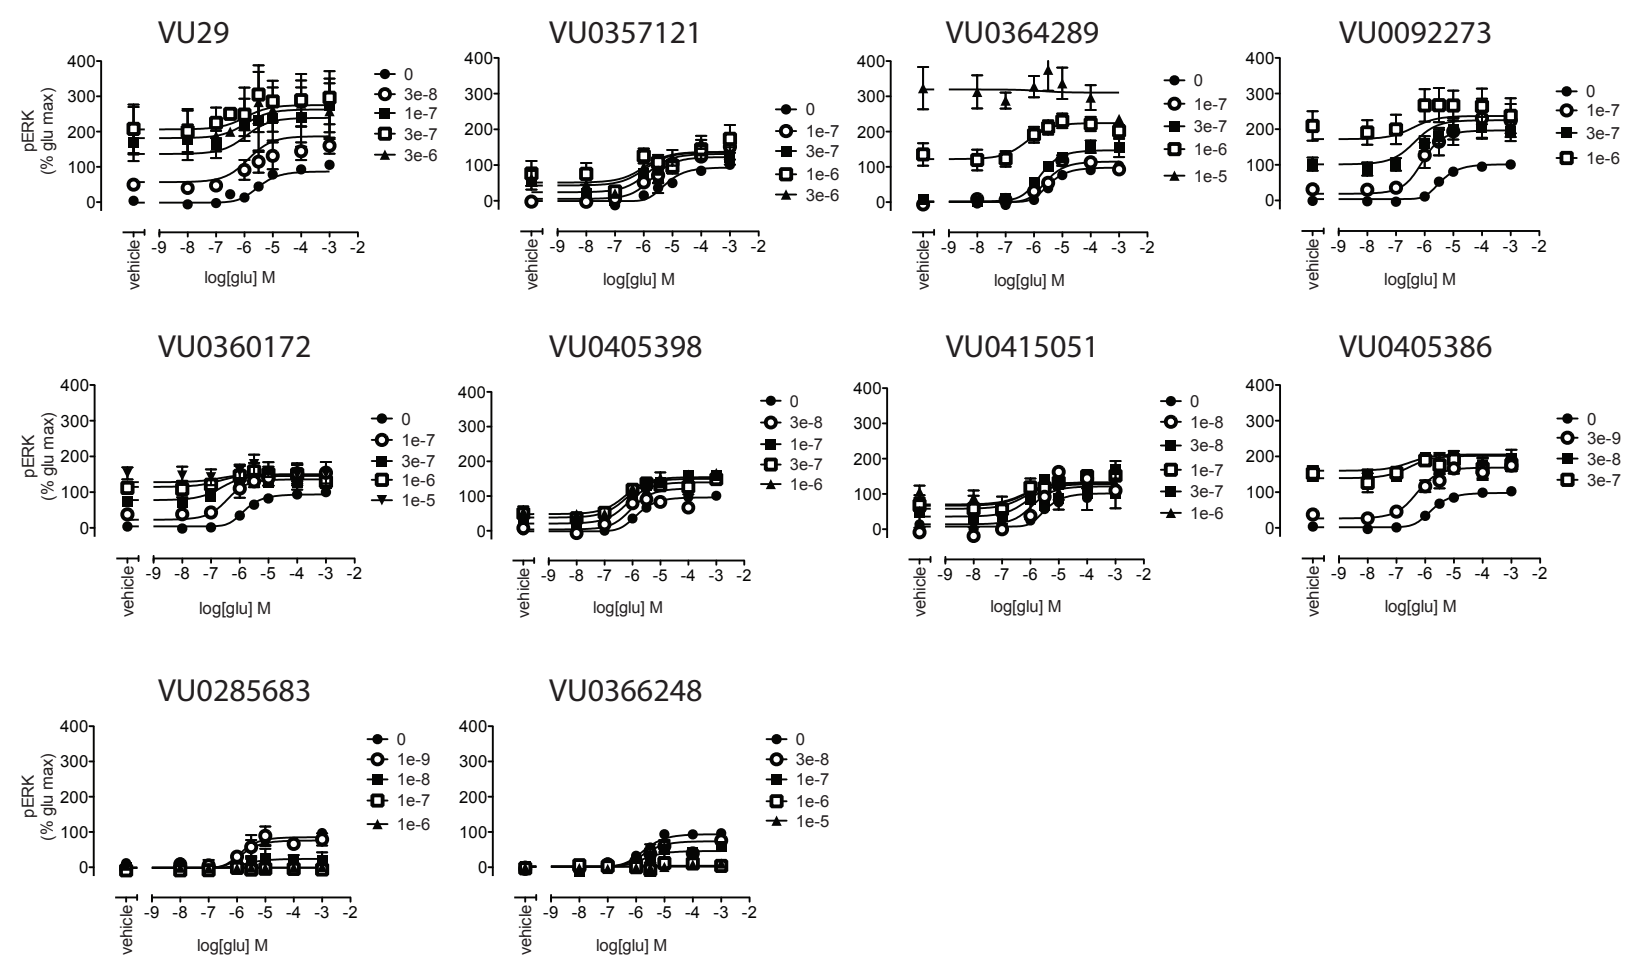

In the low-expressing HEK293A-mGlu5-wt cell line, PAMs: VU29, VU0357121, VU0364289, VU0405398, VU0415051 and VU0405386, induce a leftward shift in the glutamate concentration-response curve for ERK1/2 phosphorylation, increase the maximal agonist response and increase the basal level of response. NAMs: VU0285683 and VU0366248, inhibit glutamate-stimulated ERK1/2 phosphorylation. Data represent the mean  $\pm$  s.e.m. from a minimum of three independent determinations. Error bars not shown lie within the dimensions of the symbol.
